# Supplementary material for: Syntheses, crystal structures and magnetic properties of three novel cobalt(ii) complexes containing imidazole derivative groups
Source: Royal Society of Chemistry journal article supplement (doi:10.1039/b808385a), 2009-01-01
Supplement: b808385a.pdf [file b808385a.pdf]

## Syntheses, crystal structures and magnetic properties of three novel cobalt (II) complexes containing imidazole derivative groups

Hong Yang<sup>1</sup>, Jia-Min Chen<sup>1</sup>, Jing-Jia Sun<sup>1</sup>, Shi-Ping Yang<sup>1\*</sup>, Jie Yu<sup>2</sup>, Hong Tan<sup>2</sup>, Wei Li<sup>2\*</sup>

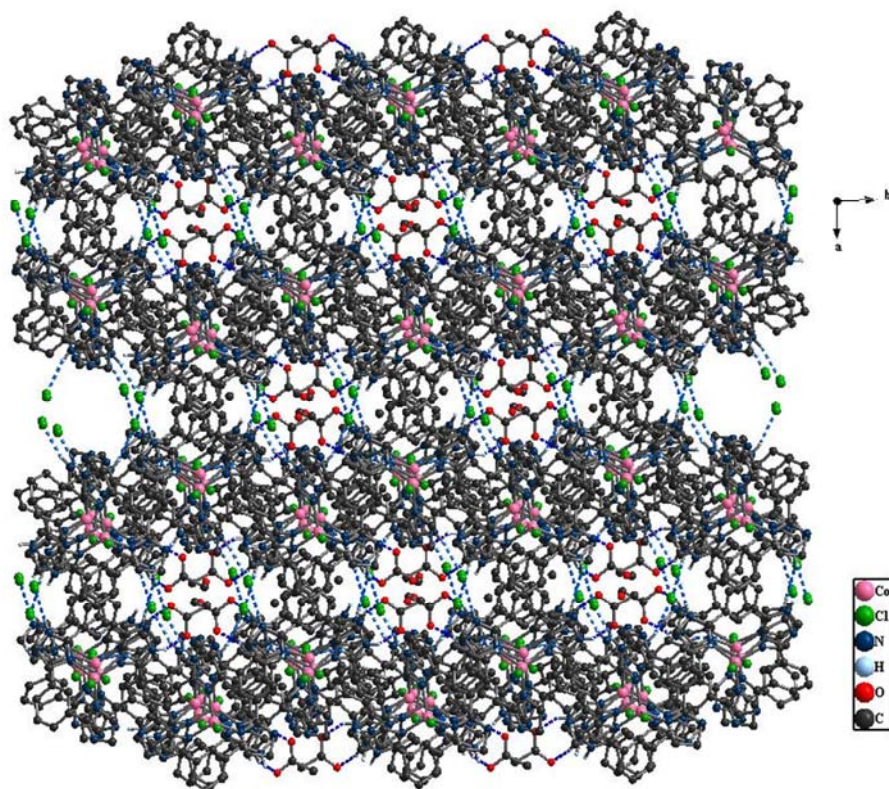

Figure s1 3-D supramolecular networks of 1

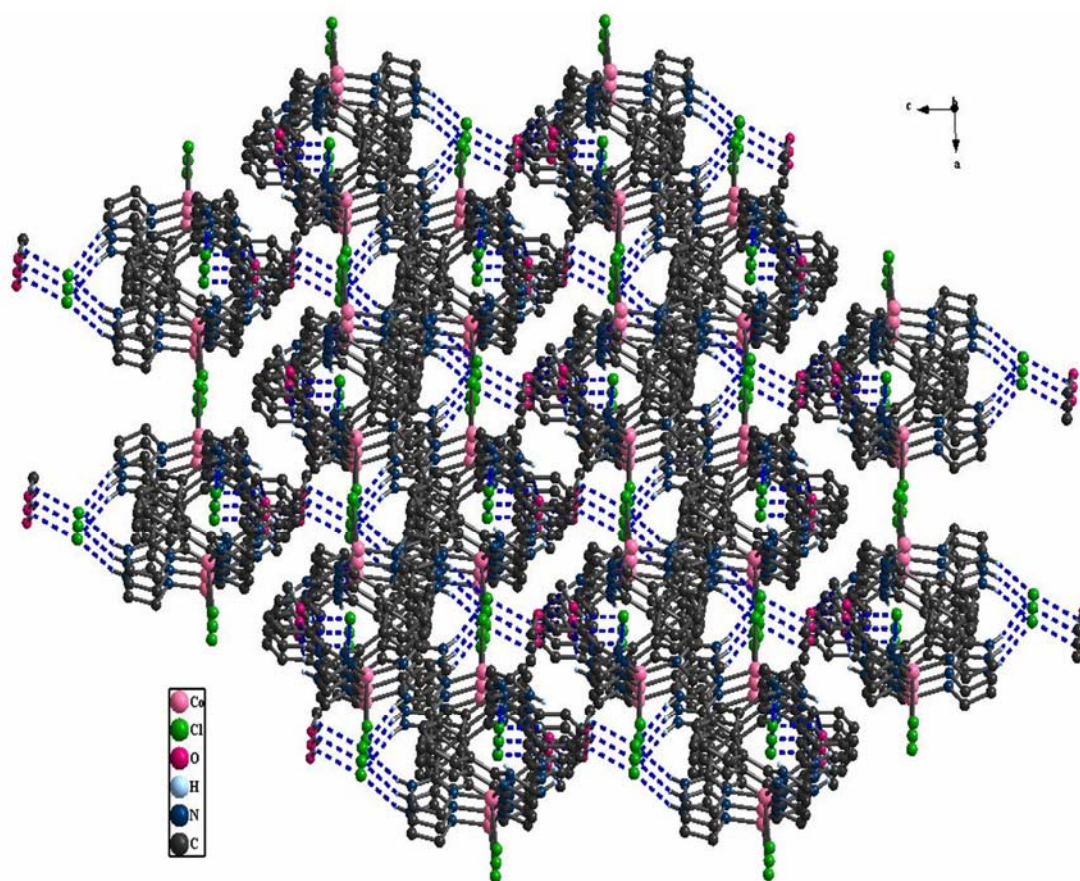

Figure s2 3-D supramolecular networks of 2

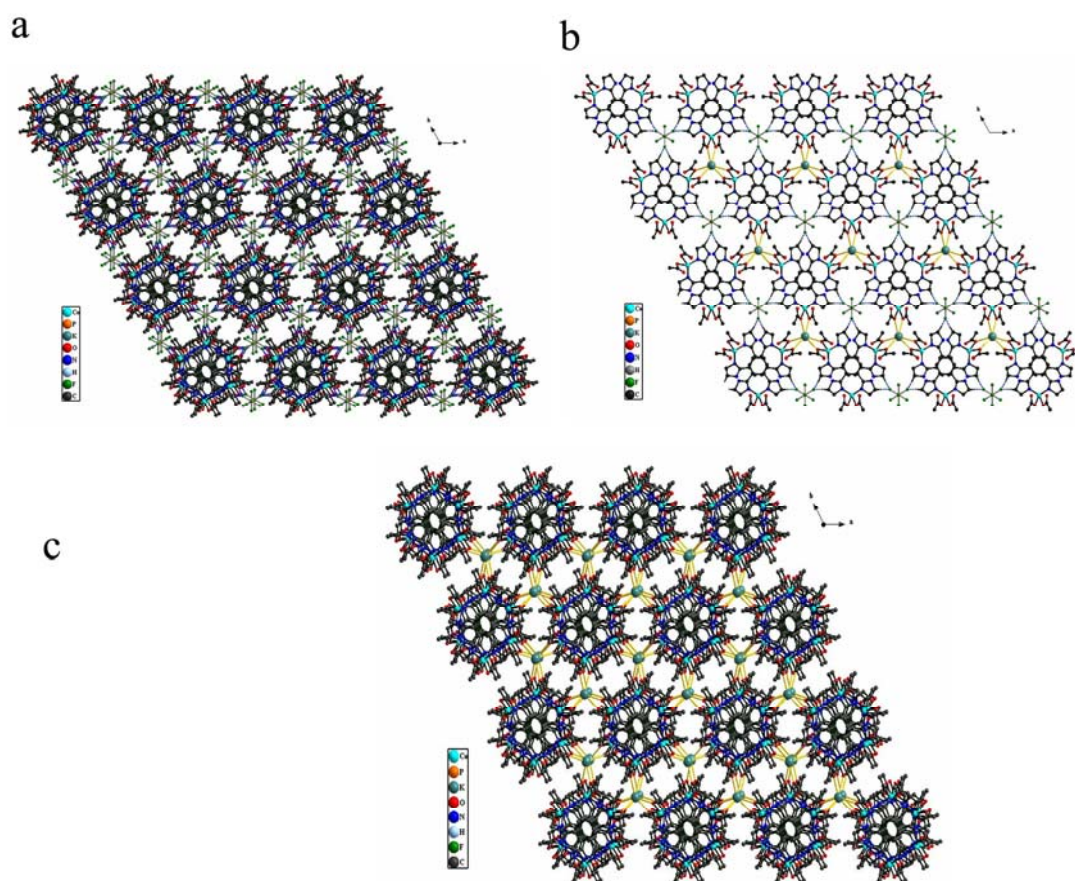

Figure s3 (a) packing of the 3D structure (no containing  $K^+$ ) (b) packing of the 2D layers (c) packing of the 3D structure for **3**
